# Supplementary material for: Topological holographic quench dynamics in a synthetic frequency dimension
Source: Springer Nature journal article supplement (doi:10.1038/s41377-021-00646-y), 2021-10-07
Supplement: 41377_2021_646_MOESM1_ESM.pdf [file 41377_2021_646_MOESM1_ESM.pdf]

# Supplementary Information for: Topological holographic quench dynamics in a synthetic frequency dimension

Danying Yu<sup>1</sup>, Bo Peng<sup>1</sup>, Xianfeng Chen<sup>1,3,4,5</sup>, Xiong-Jun Liu<sup>2,6,†</sup>, and Luqi Yuan<sup>1,\*</sup>

<sup>1</sup>*State Key Laboratory of Advanced Optical Communication Systems and Networks, School of Physics and Astronomy, Shanghai Jiao Tong University, Shanghai 200240, China*

<sup>2</sup>*International Center for Quantum Materials and School of Physics, Peking University, Beijing 100871, China*

<sup>3</sup>*Shanghai Research Center for Quantum Sciences, Shanghai 201315, China*

<sup>4</sup>*Jinan Institute of Quantum Technology, Jinan 250101, China*

<sup>5</sup>*Collaborative Innovation Center of Light Manipulations and Applications, Shandong Normal University, Jinan 250358, China*

<sup>6</sup>*Shenzhen Institute for Quantum Science and Engineering, Southern University of Science and Technology, Shenzhen 518055, China*

*Corresponding authors: \*yuanluqi@sjtu.edu.cn; †xiongjunliu@pku.edu.cn*

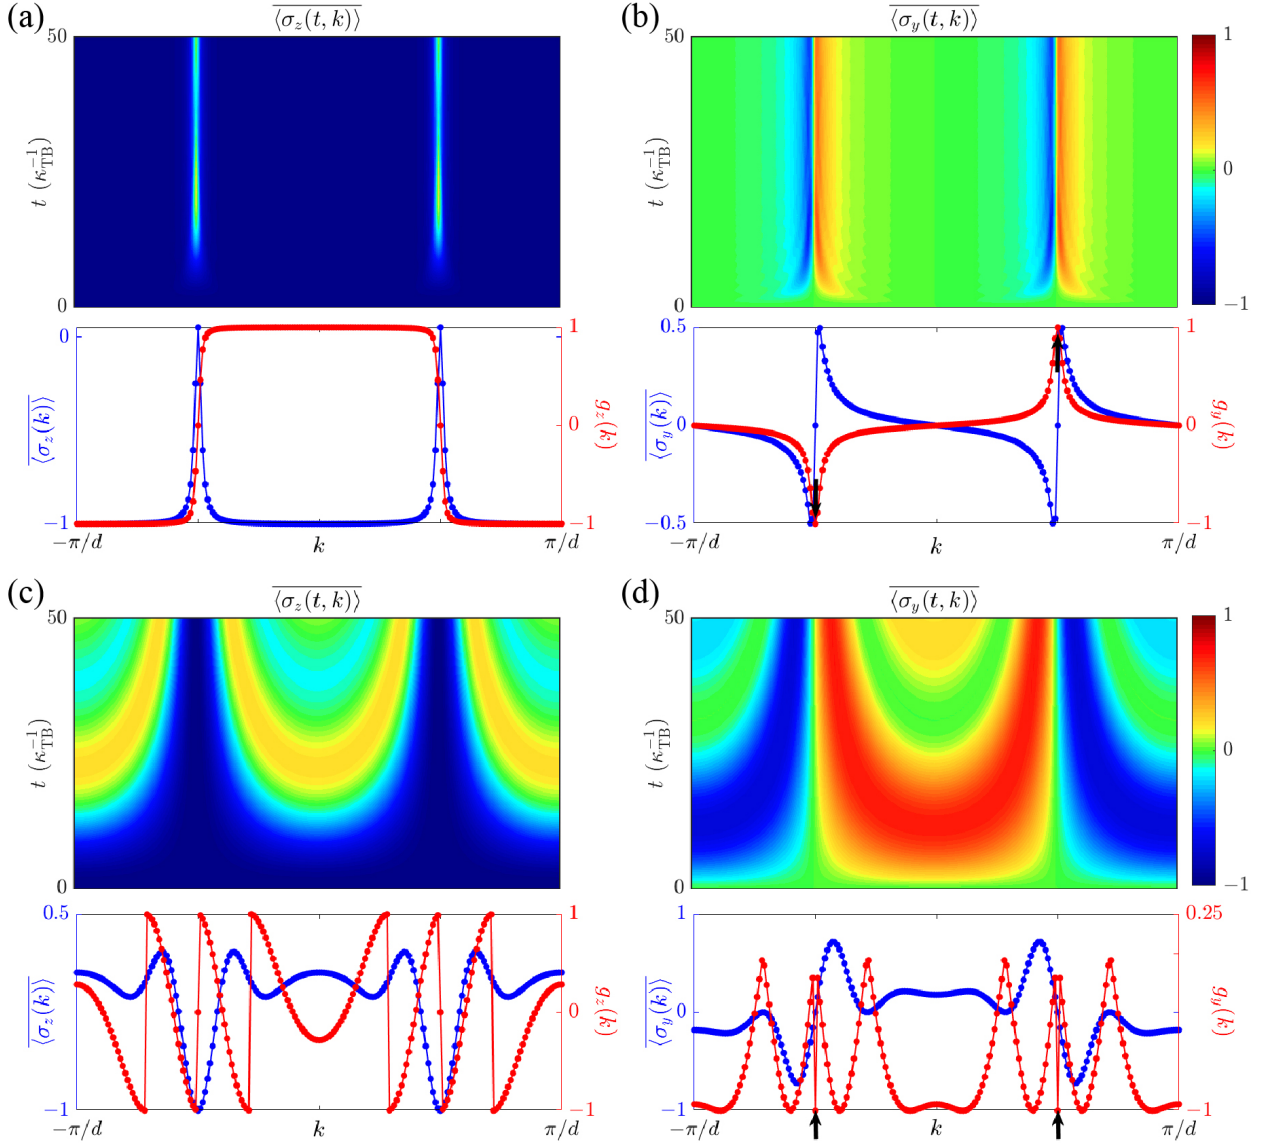

Fig. S1: Numerical simulation results of spin textures in the  $k$ -space. (a) and (b) The evolution of averaged spin-polarization  $\overline{\langle \sigma_z(t, k) \rangle}$ , the overall spin-polarization  $\overline{\langle \sigma_{z,y}(k) \rangle}$ , the dynamical spin texture  $g_{z,y}(k)$ , respectively, with  $\phi = \pi$ . (c) and (d) The evolution of averaged spin-polarization  $\overline{\langle \sigma_{z,y}(t, k) \rangle}$ , the overall spin-polarization  $\overline{\langle \sigma_{z,y}(k) \rangle}$ , the dynamical spin texture  $g_{z,y}(k)$ , respectively, with  $\phi = 0$ . Black arrows point to values of  $g_y(k = \pm\pi/2d)$

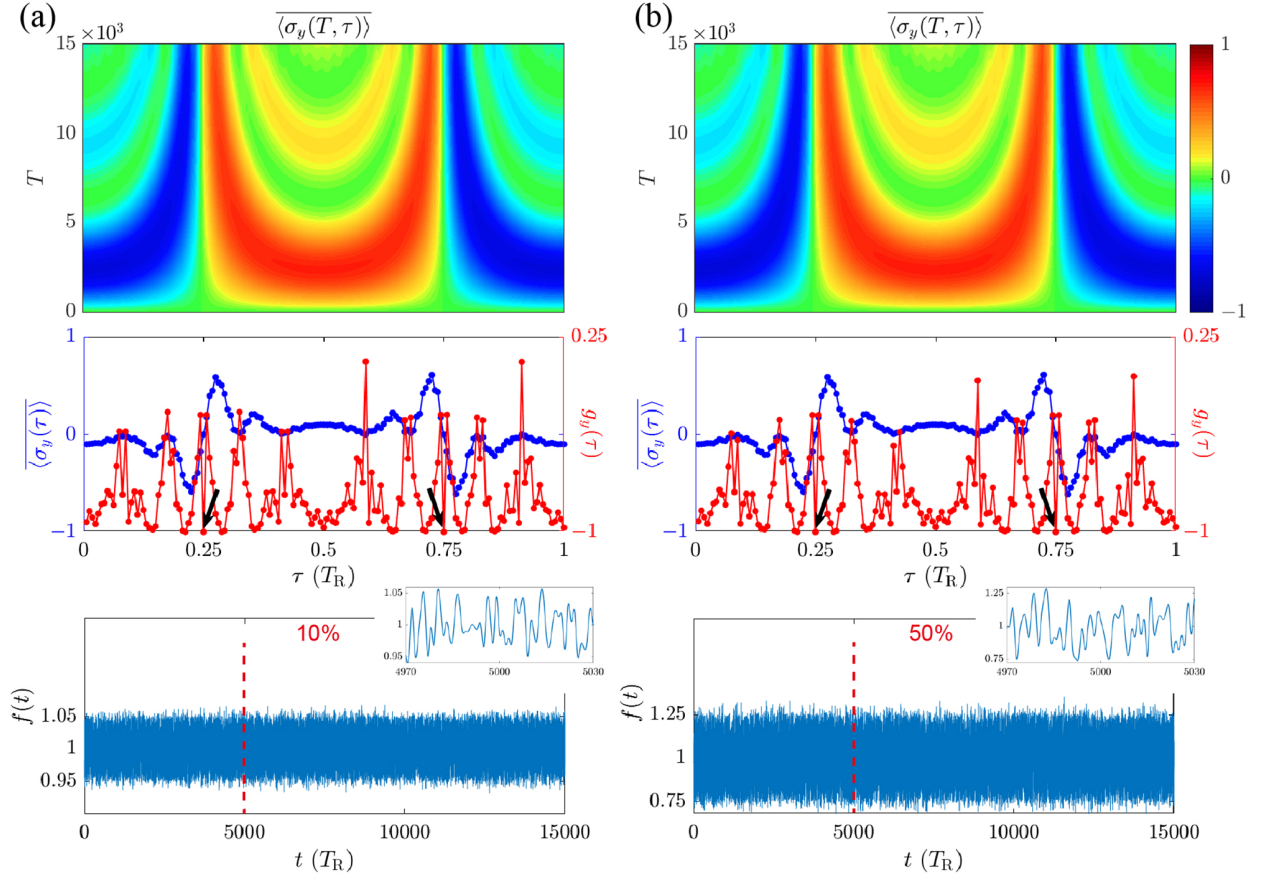

Fig. S2: The evolution of averaged spin-polarization  $\overline{\langle \sigma_y(T, \tau) \rangle}$ , the overall spin-polarization  $\langle \sigma_y(\tau) \rangle$ , the dynamical spin texture  $g_y(\tau)$  under the trivial condition, with same parameters for Fig. 3(c) and 3(d) and disorder function  $f(t)$  in  $\kappa(t)$  and  $\kappa'(t)$  with  $\delta = 10\%$ (a) and  $50\%$ (b), respectively. Black arrows point to values of  $g_y(\tau_{1,2})$ .

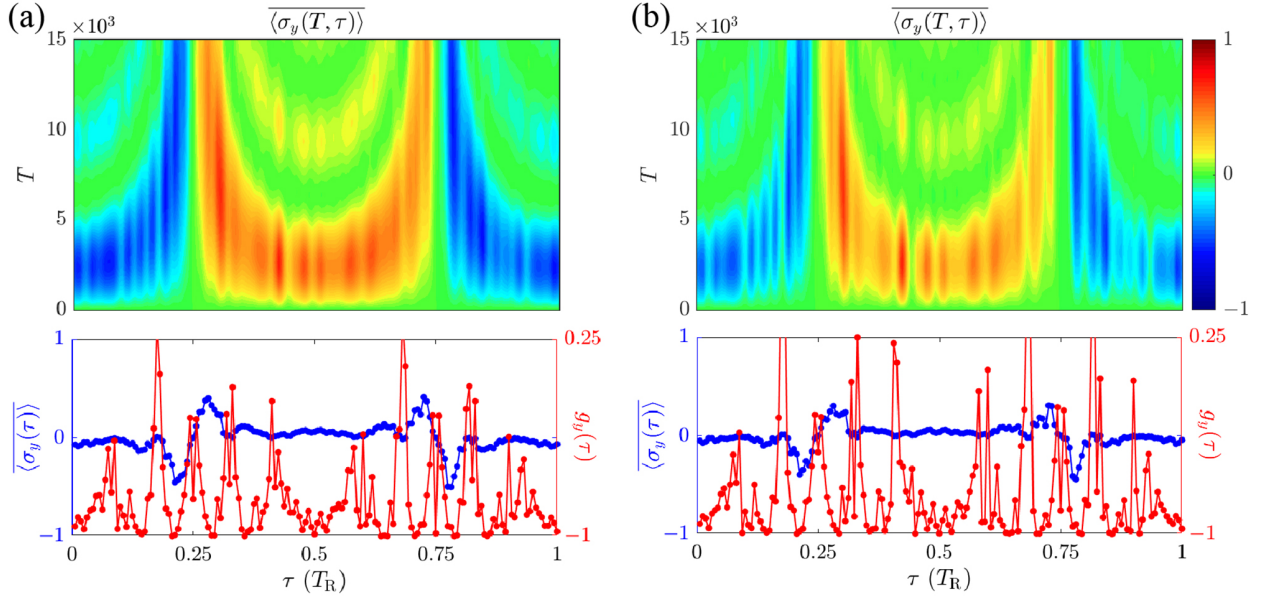

Fig. S3: The evolution of averaged spin-polarization  $\overline{\langle \sigma_y(T, \tau) \rangle}$ , the overall spin-polarization  $\overline{\langle \sigma_y(\tau) \rangle}$ , the dynamical spin texture  $g_y(\tau)$  under the trivial condition, with parameters for Figs. 3(c) and 3(d) and disorder in the input source in Eq. (10) in the main text with  $\delta = 5\%$ (a) and  $10\%$ (b), respectively.

## I. SUPPLEMENTARY NOTE 1 - RELATION BETWEEN FIELDS AND SPIN TEXTURES

Signals collected from output waveguide in Fig. 1(a) in the main text are  $\psi_A(t)$  and  $\psi_C(t)$ , respectively. Spin textures of the one-dimensional pseudo-spin lattice in Fig. 1(c) in the main text include  $\langle\sigma_z\rangle$  and  $\langle\sigma_y\rangle$ , respectively. The relation between spin textures  $\langle\sigma_z\rangle$ ,  $\langle\sigma_y\rangle$  and signals  $\psi_A$ ,  $\psi_C$  satisfies:

$$\langle\sigma_z\rangle \equiv \begin{pmatrix} \psi_A^* & \psi_C^* e^{-i\Omega t/4} \end{pmatrix} \begin{pmatrix} 1 & 0 \\ 0 & -1 \end{pmatrix} \begin{pmatrix} \psi_A \\ \psi_C e^{i\Omega t/4} \end{pmatrix} = |\psi_A|^2 - |\psi_C|^2 \quad (\text{S1})$$

$$\begin{aligned} \langle\sigma_y\rangle &\equiv \begin{pmatrix} \psi_A^* & \psi_C^* e^{-i\Omega t/4} \end{pmatrix} \begin{pmatrix} 0 & -i \\ i & 0 \end{pmatrix} \begin{pmatrix} \psi_A \\ \psi_C e^{i\Omega t/4} \end{pmatrix} \\ &= -i\psi_A^* \cdot \psi_C e^{i\Omega t/4} + i\psi_C^* e^{-i\Omega t/4} \cdot \psi_A \end{aligned} \quad (\text{S2})$$

Here the extra coefficient  $e^{\pm i\Omega t/4}$  is from the frequency offset between rings A and C. It is obvious that Eqs. (S1) and (S2) can be obtained by subtraction of intensities of two optical signals and interference between two optical signals, respectively.

## II. SUPPLEMENTARY NOTE 2 - COMPARISON WITH NUMERICAL RESULTS FROM TIGHT-BINDING MODELS

In this section, we show the numerical simulations of the corresponding spin textures by numerically solving the tight-binding model in Eq. (5) in the main text with  $\phi = \pi$  or 0, respectively. The Hamiltonian can be re-written in the  $k$ -space:

$$\begin{aligned} H_k &= \kappa_{\text{TB}}(a_k^\dagger a_k e^{ikd} e^{-i\phi} + a_k^\dagger a_k e^{-ikd} e^{i\phi} + c_k^\dagger c_k e^{ikd} + c_k^\dagger c_k e^{-ikd})/2 \\ &\quad + \eta_{\text{TB}}(a_k^\dagger c_k e^{ikd} + a_k^\dagger c_k e^{-ikd} e^{i\phi} + c_k^\dagger a_k e^{-ikd} + c_k^\dagger a_k e^{ikd} e^{-i\phi})/2 \end{aligned} \quad (\text{S3})$$

where  $d$  is the lattice constant. One can rewrite Eq. (S3) in the momentum space  $H_k = -\kappa_{\text{TB}} \cos(kd)\sigma_z - \eta_{\text{TB}} \sin(kd)\sigma_y$  when  $\phi = \pi$ , which gives the 1D AIII class topological insulator with 1D winding number [1, 2], and  $H_k = \kappa_{\text{TB}} \cos(kd)I + \eta_{\text{TB}} \cos(kd)\sigma_x$  when  $\phi = 0$ , which corresponds to a trivial phase. Here  $I$  is the unit matrix.

The Hamiltonian Eq. (S3) in the topological regime ( $\phi = \pi$ ) and in quasi-momentum space reads  $H_k = h_z(k)\sigma_z + h_y(k)\sigma_y$ , where  $h_z(k) = -\kappa_{\text{TB}} \cos(kd)$  and  $h_y(k) = -\eta_{\text{TB}} \sin(kd)$ .

The 1D winding number is simply characterized by the number of times that the unit vector  $\bar{\mathbf{h}}(k) = (h_z(k), h_y(k))/|h(k)|$  covers the unit circle in the  $y$ - $z$  plane when  $k$  runs over from 0 to  $2\pi$ . This 1D winding number is further given by the quantities of  $\bar{h}_y(k)$  on the band inversion points where  $\bar{h}_z(k) = 0$  [3]. For example, if there are two band inversion points with  $\bar{h}_z = 0$ , and then the system is topologically nontrivial if  $\bar{h}_y$  takes opposite values on the two band inversion points, defining a nonzero  $C_0$ . The dynamical spin texture  $g_y(k) = \bar{h}_y(k)$  on two band inversion points, hence determines the topology of the post-quench system. Note that, in a model with the synthetic frequency dimension, the Bloch momenta  $k$  refers to the fast time variable  $\tau$ , as illustrated in the main text.

The spin textures of the system can then be simulated with initial condition  $\langle\sigma_z\rangle = -1$ ,  $\langle\sigma_y\rangle = 0$ ,  $\langle\sigma_x\rangle = 0$ , and  $\eta_{\text{TB}} = 0.05\kappa_{\text{TB}}$ . The simulation results of  $\langle\sigma_z(t, k)\rangle$  for  $\phi = \pi$  and 0 are obtained, and corresponding  $\overline{\langle\sigma_{z,y}(t, k)\rangle}$ ,  $\overline{\langle\sigma_{z,y}(k)\rangle}$ , and  $g_{z,y}(k)$  can be defined in the same procedure as that in the main text and then be plotted in Fig. S1. One can notice that these numerical results give the non-trivial feature for  $\phi = \pi$  and trivial feature for  $\phi = 0$ , respectively [3]. Comparing both results in Fig. 3 in the main text and Fig. S1, one finds the consistency in the quench dynamics which gives the same evidences for either non-trivial or trivial case.

### III. SUPPLEMENTARY NOTE 3 - COMPARISONS WITH TRIVIAL CASES WITH DISORDERS

**Quench dynamics with disorders in the phase modulators under the trivial case.** In the main text, we have shown  $\overline{\langle\sigma_y(T, \tau)\rangle}$  together with  $\overline{\langle\sigma_y(\tau)\rangle}$  and  $g_y(\tau)$  in the nontrivial case under the perturbation from the disorder in phase modulators. Here, we show the corresponding trivial case by setting  $\phi = 0$  and using other parameters the same as those for generating Fig. 4 in the main text. In Fig. S2, evolutions of  $\overline{\langle\sigma_y(T, \tau)\rangle}$  in the trivial case under different disorder  $\delta$  show similar pattern compared with Fig. 3(d) in the main text. The averaged spin-polarization pattern and the dynamical spin texture also exhibit similar profiles compared with Fig. 3(d) in the main text under the trivial case.

**Quench dynamics with disorders in the input source under the trivial case.** In the main text, we plot  $\overline{\langle\sigma_y(T, \tau)\rangle}$  together with  $\overline{\langle\sigma_y(\tau)\rangle}$  and  $g_y(\tau)$  under the perturbation from disorder in the input source in Fig. 5 for the nontrivial case. Here, we give the corresponding

simulation under the trivial case by setting  $\phi = 0$ . In Fig. S3, the disorder in the input source affects the pattern of  $\overline{\langle\sigma_y(T, \tau)\rangle}$  with larger  $\delta$ , but  $\overline{\langle\sigma_y(\tau)\rangle}$  and  $g_y(\tau)$  still give the similar profiles compared with Fig. 3(d) in the main text.

## SUPPLEMENTARY REFERENCES

---

- [1] Song, B et al. Observation of symmetry-protected topological band with ultracold fermions. *Science Advances* **4**, eaao4748 (2018).
- [2] Liu, X. J., Liu, Z. X. & Cheng, M. Manipulating Topological Edge Spins in a One-Dimensional Optical Lattice. *Physical Review Letters* **110**, 076401 (2013).
- [3] Zhang, L. et al. Dynamical classification of topological quantum phases. *Science Bulletin* **63**, 1385-1391 (2018).
